# Supplementary material for: Discovery and Characterization of the Metallopterin-Dependent Ergothioneine Synthase from Caldithrix abyssi
Source: PubMed Central journal article supplement (PMC9516567; doi:10.1021/jacsau.2c00365), 2022-08-16
Supplement: au2c00365_si_001.pdf [file au2c00365_si_001.pdf]

Supplementary information for

## **The Discovery and Characterization of the Metallopterin-Dependent Ergothioneine Synthase from *Caldithrix abyssi***

Mariia A. Beliaeva<sup>1,2</sup> and Florian P. Seebeck<sup>1,2\*</sup>

florian.seebeck@unibas.ch

<sup>1</sup>Department of Chemistry, University of Basel, Mattenstrasse 24a, Basel 4002, Switzerland

<sup>2</sup>Molecular Systems Engineering, National Competence Center in Research (NCCR), 4058 Basel, Switzerland

## Sequences of proteins encoded in expression plasmids:

>CaMES (*Caldithrix abyssi*, UniProt A0A7V4WV16), plasmid: pCOLADuet-1

MGHHHHHAENLYFQSGSGMSIAEPNTEKRALCGICPAGCWWKVKYDAGGRLSQVKADSSHLGMICTLGEHSADIVYSEHRLRYPMRRKPKGKSYDFERISWDTAYD  
IIVDNLQKIKKESGPEATAVYTRGGSFELAMCDVFPQKGVAVSSASSVLPFPFSGPNTLGVGALCYVFSFAMIAPHVTMGGMLINMFSDI ERAELIVVWGANPATDSP  
LDFQRIVAAQKRGAAQVQVVIDPRRTKTAKVTDQWIVPVRPGTDGALALGCLNVLIEEELYDESFAWDWTLGDFDFTRHVQHYRPEVVERITGVPAQTQVELARRIAAA  
NGAAPVMYSGLEYSNSGVQAIRATMALWALAGQLDVPGGRCFNMNRDNTFPINREGLIPNPEAKALGRDRFPVYSAYRGE SHAIALPEAVLNGDPYRIRSLILGGS  
IITAWPQPDIDWRKTLKTLDFLVTIDRQLTADSAYADIVLPATMYEIESYMTYGSFRIREKVI EPVGEARNDFFIMAEALAKRLGYGHLYPQNEDELRLRYLVKSGSF  
TPEEVRAGGLVQKPTSILEYKWEKGLLRSDGQKGFDTSPGKFEASQFLAEHGYDPLVYIETPTGELSRPDLAKEFPLVFNSSGRVTTDFRSQHGGIPALNKRR  
REPQVTMNSADAGERGIKSGDWVRISTRRGSVMRAYVTDIVAGSIDADMGGGGPVPQAWQKCNINDVTDLQNYDPISGFVYKTLKQVSKVSESGKDGTVLDSG  
EASGTTAADNGNGRAAQPEFKRIYLDHNATTPIDPEVKKVMREYLDAGQGNPSAIYHEGKESRFAVEAARRSVARLLNCTARRIVFTGGGSEANNLAIKGI AFAHEG  
KRNHII TSQIEHPAIRNTCKWLESRGFTVYLPVDQFGRVVRPHDLEKASIDRTLLVSVMLANNETGSIQPVAEALARIAHQHGAYMHTDAVQAVAKIPVDVNELEVDL  
LTLSGHKFYGPKGIGALYVRKDIPLTPLVHGGHQSDDLRACTENVLAMVGLGAADLAVQRLPKMKKVEALRNHLEEEIKKI IPEARVNGHPVHRVPVTLNMTIPGM  
RGESLVLALDEKGLSLSSGSACRSRSPDPSPALLAMGLSEEEAHCALRFLSLGVTAKDIERTLHLFEVVTDAKTMVRFIPCR

>EaMES (*Euryarchaeota archaeon*, UniProt A0A1V6KBG7), plasmid: pCOLADuet-1

MGHHHHHAENLYFQSGSMTHVTQGERRALCGICSAAGCVIVAYDDHGRISASVRPEDEAIGIICRLGEASPEIVYSSDRVLYPLRRAGPKGTHAFERITWDEAYET  
IVANLTRI REESGPEAVAIYTGSGSFELDFCFIQPKGVAVSSASSVLPFPFSGPNTLGVGALCYVFSFAMIAPHVTMGGMLINMFSDI ERAELIVVWGANPATDSP  
ALRALAGARRRGAEEVVIDPRRTKTAKVTDQWIVPVRPGTDGALALGCLNVLIEEELYDESFAWDWTLGDFDFTRHVQHYRPEVVERITGVPAQTQVELARRIAAA  
GASFAMYTGLEYSNSGVQAIRAVFVLWGISGNDLVPGGRCFAMRGNAPPINRSGYIQNDPLKRAIGTDRFPVYTHYRQEGHAIALPDAVLRGRPYRIRALILEAAHM  
LISWPQTPVWRFTLANLDFLVSVDRLHTADAA YADIVLPATMYEIESYMTYGSFRIREKVI EPVGEARNDFFIMAEALAKRLGYGHLYPQNEDELRLRYLVKSGSF  
LEGVRAAGTVRSPAAMMEYRKEWKGLLRPDGRPGDTPTKGFEIYSTILEEYGYDPLVYIETPTGELSRPDLAKEFPLVFNSSGRVTTDFRSQHGGIPALNKRR  
EPTVTLNSHDARERGRIRDGDVIVRTRARGEIVLRLALVTDGIVRGAVANMGGGCHQAPEAWREGVNNELDLARYDPI SGFPVYKALLCDVARAEGDGRVAIGTGE  
VDSVAGAAPPPEAPRIYLDHNATTPIDPAVHQMAAYLTSNPNGLSIIYREGDRKAVESARRSLARLLNCTARRIVFTGGGSEANNLAIKGI AFAHEG  
KRNHII TSQIEHPAIRNTCKWLESRGFTVYLPVDQFGRVVRPHDLEKASIDRTLLVSVMLANNETGSIQPVAEALARIAHQHGAYMHTDAVQAVAKIPVDVNELEVDL  
LTLSGHKFYGPKGIGALYVRKDIPLTPLVHGGHQSDDLRACTENVLAMVGLGAADLAVQRLPKMKKVEALRNHLEEEIKKI IPEARVNGHPVHRVPVTLNMTIPGM  
LALDRRGI SLSSGSACHSGSPAPSHVLLAMGLSAEDAHCIRMTLGAHTTDEDI DRTLGAFLRLLHGPGEIIRFVACR

>AbMES (*Abyssubacteria bacterium*, UniProt A0A3A1NVY7), plasmid: pCOLADuet-1

MGHHHHHAENLYFQSGSMTEISTQLAPQDSPAQEI KDGLCGICPAGCWWKVKYDAGGRLSQVKADSSHLGMICTIGKHSQIIVHDPNRLQYPLRRTPGKGSYDFE  
RTWNEAMEA IAGKLDIKREHGEATAIYTRGGSFELSMCDVYQPRGAVSSASSVLPFPFSGPNTLGVGALCYVFSFAMIAPHVTMGGMLINMFSDI ERAELIVVWGAN  
ANPATDSPPLAHAQILRARERGAEEVVIDPRRSETAREAESEWIPLRPGTDGALALGMINVLEVEELYDEDFAEENWTLGPNELKQYVQHFREPTEVQITTEVPAEKVR  
LSRRIRARARGACPVMYTGLEYSDSSEVQAI RAVHTLWALAGQLDVPGLVFRMKNIFP INRSGLIANPDRKALGRDRFPVYSMYRGE SHAIALPEAVLNGDPYRIRSLILGGS  
RSLIILGASIIYAWPQPDIDWRKTLKTLDFLVCIDRYFTADAA YADIVLPATMYEIESYMTYGSFRIREKVI EPVGEARNDFFIMAEALAKRLGYGHLYPQNEDELRLRYLVKSGSF  
RHVLCQSGYTLLEEVKAGGEVRLPVMQQYKMKWGLLRDPGKPGFNTPSGKFEIASSIIAEHGYDALPVYIETPTGELSRPDLAKEFPLVFNSSGRVTTDFRSQHGGIPALNKRR  
GVSGLEMTDIPVIMNAVDASERGIENGDWVNVTKRQGVKFRIVTDDIMPDAI DACMGGGGPLGSRWSQECNVNELDLTRYDPI SGFPVYKSLLAEEVVKAGVA  
KSADRI TEVSPAKTRESRHRPCKLRHVLDHNATTPMDPEVVEAMMPYLRESFGNPSSIHQRGEARDAVEGARRKVAQLINCTARRVFTGGGSEANNLAIKGI AFAHEG  
KRNHII TSQIEHPAIRNTCKWLESRGFTVYLPVDQFGRVVRPHDLEKASIDRTLLVSVMLANNETGSIQPVAEALARIAHQHGAYMHTDAVQAVAKIPVDVNELEVDL  
LTLSGHKFYGPKGIGALYVRKDIPLTPLVHGGHQSDDLRACTENVLAMVGLGAADLAVQRLPKMKKVEALRNHLEEEIKKI IPEARVNGHPVHRVPVTLNMTIPGM  
NVTLPAMRGESLVMLFSLRRGVYCSSGSACKSGNPEPSTLTLAMGLSVEADHACALRLSLGSGNNEEDVKYMLHLVGLQIIRDSRSVRFACR

>hvMES (*hydrothermal vent metagenome*, UniProt A0A3B1C0R1), plasmid: pCOLADuet-1

MGHHHHHAENLYFQSGSMKDRTELEWKKGICGICPAGCWI EAGMQAGKMDI RADTSHQLGMIICRRGQHAPEI IYSEQLKYPLKRVGPKGKHAFAFERISWDEAYDCI  
VKNLNAIKAESGPEAVSIYTRGAFELSLCDMYQKPDVAVSSASNILFPFSGPNTLGVGALCYVFSFAMIAPHVTMGGMLINMFSDI ERAELIVVWGANPATDSPPLD  
MARLEAAAKRGCDMVVIDPRYETAKRTGAEWIARIPGTDGALALGMMVGLI DEEDLVEKFEVQWTHGFADLTGYVQHFREPVEVERITGVPAQITRELARRIARATG  
AAPVMYTGLEYNSGIVQAVRAVLSLFAISGHLDTGGTGLAMRGQHFVNRSCNQNDPLARAARADKFPYSDYRGE SHAIGLHSEPIYRGLIHGASLL  
TSPWQTSIWRKTLKTLDFVVSIDRQLTADSAYADIVLPATMYEIESYMTYGSFRIREKVI EPVGEARNDFFIMAEALAKRLGYGHLYPQNEDELRLRYLVKSGSF  
EDIQRNGWVVKLPTPMMEYKYEKGLRADGKPGFETPTGKFEIWSKLEEYEGYEPKPKVVEPVGQAAPELSQRFPVFNSSGRVTTDFRSQHGGIPALNKRR  
PTVEINSSDARERGIIEPGLDLRTPRGAVPFRARVSDIVRGAIEANMGGGTPVPGKAWQEWNVNELTDLYNVEIISGFVYKALCEVVKIRSAKTRLRITDS  
EKGTADFTFKGSDRKNRQRIYLDHNATTAIAKSVKEAMQPLDLSFGNPSIIHSTGRDARDAVDKARRQVARLIGARPKRITFTGGGSEANNLAIKGI AFAHEG  
KRNHII TSQIEHPAIRNTCKWLESRGFTVYLPVDQFGRVVRPHDLEKASIDRTLLVSVMLANNETGSIQPVAEALARIAHQHGAYMHTDAVQAVAKIPVDVNELEVDL  
LTLSGHKFYGPKGIGALYVRKDIPLTPLVHGGHQSDDLRACTENVLAMVGLGAADLAVQRLPKMKKVEALRNHLEEEIKKI IPEARVNGHPVHRVPVTLNMTIPGM  
GESLVVALDQHGIFSSGSACKSGPKPHTVLMAMGCSEDAHCAVRFSLDAGIRQKIDIVTLAELKNVLEIETTFRFLPCK

>EgtD (*Mycolicibacterium smegmatis*, UniProt A0R5M8), plasmid: pET19b

MGSSHHHHHSSGLVPRGSHMALSLANYLAADSAEALRRDVRAGLTATQKSLPKWFLYDAVGSDDLFDQITRLPEYPTRTAEQILTRSAEIIISAAGADLILGSD  
GTSEKTRMLLDAMRDAELRRFPFVDVADGVLRSAGAAIGAEYPGIEIDAVCGDFEEHLGKIPHVGRRLVFLGSTIGNLTPAPRAEFLSTLADTLQPGDSSLVLTG  
LVKDTGRLVRAVDAAQYTAAFNRNVLAVNRLSAGAAIGAEYPGIEIDAVCGDFEEHLGKIPHVGRRLVFLGSTIGNLTPAPRAEFLSTLADTLQPGDSSLVLTG  
RQTHWWTDPAGDFGLSLAVR

>CaMES<sub>C-term</sub> (C-terminus of CaMES), plasmid: pET28a

MGHHHHHAENLYFQSGSGMAQPEFKRIYLDHNATTPIDPEVKKVMREYLDAGQGNPSAIYHEGKESRFAVEAARRSVARLLNCTARRIVFTGGGSEANNLAIKGI AFAHEG  
AHEGKRNHII TSQIEHPAIRNTCKWLESRGFTVYLPVDQFGRVVRPHDLEKASIDRTLLVSVMLANNETGSIQPVAEALARIAHQHGAYMHTDAVQAVAKIPVDVNELEVDL  
EVDLLTSLGSKFYGPKGIGALYVRKDIPLTPLVHGGHQSDDLRACTENVLAMVGLGAADLAVQRLPKMKKVEALRNHLEEEIKKI IPEARVNGHPVHRVPVTLNMTIPGM  
IPGMGESLVLALDEKGLSLSSGSACRSRSPDPSPALLAMGLSEEEAHCALRFLSLGVTAKDIERTLHLFEVVTDAKTMVRFIPCR

>CaMES<sub>C1538</sub>, plasmid: pET28a

MGHHHHHAENLYFQSGSGMSIAEPNTEKRALCGICPAGCWWKVKYDAGGRLSQVKADSSHLGMICTLGEHSADIVYSEHRLRYPMRRKPKGKSYDFERISWDTAYD  
IIVDNLQKIKKESGPEATAVYTRGGSFELAMCDVFPQKGVAVSSASSVLPFPFSGPNTLGVGALCYVFSFAMIAPHVTMGGMLINMFSDI ERAELIVVWGANPATDSP  
LDFQRIVAAQKRGAAQVQVVIDPRRTKTAKVTDQWIVPVRPGTDGALALGCLNVLIEEELYDESFAWDWTLGDFDFTRHVQHYRPEVVERITGVPAQTQVELARRIAAA  
NGAAPVMYSGLEYSNSGVQAIRATMALWALAGQLDVPGGRCFNMNRDNTFPINREGLIPNPEAKALGRDRFPVYSAYRGE SHAIALPEAVLNGDPYRIRSLILGGS  
IITAWPQPDIDWRKTLKTLDFLVTIDRQLTADSAYADIVLPATMYEIESYMTYGSFRIREKVI EPVGEARNDFFIMAEALAKRLGYGHLYPQNEDELRLRYLVKSGSF  
TPEEVRAGGLVQKPTSILEYKWEKGLLRSDGQKGFDTSPGKFEASQFLAEHGYDPLVYIETPTGELSRPDLAKEFPLVFNSSGRVTTDFRSQHGGIPALNKRR  
REPQVTMNSADAGERGIKSGDWVRISTRRGSVMRAYVTDIVAGSIDADMGGGGPVPQAWQKCNINDVTDLQNYDPISGFVYKTLKQVSKVSESGKDGTVLDSG  
EASGTTAADNGNGRAAQPEFKRIYLDHNATTPIDPEVKKVMREYLDAGQGNPSAIYHEGKESRFAVEAARRSVARLLNCTARRIVFTGGGSEANNLAIKGI AFAHEG  
KRNHII TSQIEHPAIRNTCKWLESRGFTVYLPVDQFGRVVRPHDLEKASIDRTLLVSVMLANNETGSIQPVAEALARIAHQHGAYMHTDAVQAVAKIPVDVNELEVDL  
LTLSGHKFYGPKGIGALYVRKDIPLTPLVHGGHQSDDLRACTENVLAMVGLGAADLAVQRLPKMKKVEALRNHLEEEIKKI IPEARVNGHPVHRVPVTLNMTIPGM  
RGESLVLALDEKGLSLSSGSACRSRSPDPSPALLAMGLSEEEAHCALRFLSLGVTAKDIERTLHLFEVVTDAKTMVRFIPCR

>CaMES<sub>K952a\_a</sub>, plasmid: pET28a

MGHHHHHAENLYFQSGSGMSIAEPNTEKRALCGICPAGCWWKVKYDAGGRLSQVKADSSHLGMICTLGEHSADIVYSEHRLRYPMRRKPKGKSYDFERISWDTAYD  
IIVDNLQKIKKESGPEATAVYTRGGSFELAMCDVFPQKGVAVSSASSVLPFPFSGPNTLGVGALCYVFSFAMIAPHVTMGGMLINMFSDI ERAELIVVWGANPATDSP  
LDFQRIVAAQKRGAAQVQVVIDPRRTKTAKVTDQWIVPVRPGTDGALALGCLNVLIEEELYDESFAWDWTLGDFDFTRHVQHYRPEVVERITGVPAQTQVELARRIAAA  
NGAAPVMYSGLEYSNSGVQAIRATMALWALAGQLDVPGGRCFNMNRDNTFPINREGLIPNPEAKALGRDRFPVYSAYRGE SHAIALPEAVLNGDPYRIRSLILGGS  
IITAWPQPDIDWRKTLKTLDFLVTIDRQLTADSAYADIVLPATMYEIESYMTYGSFRIREKVI EPVGEARNDFFIMAEALAKRLGYGHLYPQNEDELRLRYLVKSGSF  
TPEEVRAGGLVQKPTSILEYKWEKGLLRSDGQKGFDTSPGKFEASQFLAEHGYDPLVYIETPTGELSRPDLAKEFPLVFNSSGRVTTDFRSQHGGIPALNKRR  
REPQVTMNSADAGERGIKSGDWVRISTRRGSVMRAYVTDIVAGSIDADMGGGGPVPQAWQKCNINDVTDLQNYDPISGFVYKTLKQVSKVSESGKDGTVLDSG  
EASGTTAADNGNGRAAQPEFKRIYLDHNATTPIDPEVKKVMREYLDAGQGNPSAIYHEGKESRFAVEAARRSVARLLNCTARRIVFTGGGSEANNLAIKGI AFAHEG  
KRNHII TSQIEHPAIRNTCKWLESRGFTVYLPVDQFGRVVRPHDLEKASIDRTLLVSVMLANNETGSIQPVAEALARIAHQHGAYMHTDAVQAVAKIPVDVNELEVDL  
LTLSGHKFYGPKGIGALYVRKDIPLTPLVHGGHQSDDLRACTENVLAMVGLGAADLAVQRLPKMKKVEALRNHLEEEIKKI IPEARVNGHPVHRVPVTLNMTIPGM  
RGESLVLALDEKGLSLSSGSACRSRSPDPSPALLAMGLSEEEAHCALRFLSLGVTAKDIERTLHLFEVVTDAKTMVRFIPCR

LTLSGHAFYGPKGIGALYVRKDIPLTPLVHGGHESDLRAGTENVLAMVGLGAADLAVQRLPKMKKVEALRNHLEEE IKKI IPEARVNGHPVHRVPVTLNMTI PGM  
RGESLVLALDEKGLSLSSGSACRSGSPDPSALLAMGLSEEEAHCALRFLSGVKTAKDIERTLHLFEEVVTDAKTMVRF IPCR

>CaMES<sub>952A\_b</sub>, plasmid: pETDuet-1

GGHHHHHAENLYFQSGMSIAEPNTEKRALCGICPAGCWVKVYDAGGRLSQVKADSSHLGMICTLGEHSADIVYSEHRLRYPMRRKPKGSYDFERISWDTAYD  
IIVDNLQKIKKESGPEATAVYTRGGSFELAMCDVFPKGVAVSSASVLPFGSPNTLGVGALCYVFSAMIAPHVTMGGMLINMFSDI ERAELIVVWGANPATD SPP  
LDFQRIVAAQKRGAQVQVVIDPRRTKTAQVTDQWIPVRPGTDGALALGCLNVLIEEELYDES FARDWTLGFDDFTRHVQHYPVEVVERITGVPAQTVQELARRIAAA  
NGAAPVMYSGLEYSNSGVQAIRATMALWALAGQLDVPGGRCFNMRDNTFPINREGLIPNPNEAKALGRDRFPVYSAYRGE SHAIALPEAVLNGDPYRIRSLIILGGS  
IITAWPQPD IWRKTLKTLDFLVTIDRQLTADSAYADIVLPATMYEIESYMTYGS MFRIREKVI EPVGEARNDF FIMAE LAKRLGYGHLYPQNEDELLRYVLKGS GF  
TPEEVRAKGGVLQKPTSILEYKWEKGLLRSDGQKGFDTPSGKFELASQFLAEHGYDPLPVYTEPTEGPLSRPDLAKEFPLVFNSSGSRVTTDFRSQHGGIPALNKRR  
REPQVTMNSADAGERGIKSGDWVRISTRRGSVVMRAYVTDIVAGSIDADMGGGGPVPQAWQKCNINDVTDLQNYDPISGFPVYKTLQCQVSKVESGKGTVDLDSG  
EASGTIADNNGRAAQPEFKRIYLDHNATTPIDPEVKVMREYLDAGQGNPSAIYHEGKESRF AVEAARRSVARLLNCTARRIVFTGGGSEANNLAIKG IAF AHEG  
KRNHII TSQIEHPAIRNTCKWLESRGFTVYLPVDQFGRVVRPHDLEKAI SDRTLLVSVMLANNETGSIQPVAELARIAHQHGAYMHTDAVQAVAKI PVDVNELEVDL  
LTLSGHAFYGPKGIGALYVRKDIPLTPLVHGGHESDLRAGTENVLAMVGLGAADLAVQRLPKMKKVEALRNHLEEE IKKI IPEARVNGHPVHRVPVTLNMTI PGM  
RGESLVLALDEKGLSLSSGSACRSGSPDPSALLAMGLSEEEAHCALRFLSGVKTAKDIERTLHLFEEVVTDAKTMVRF IPCR

>CaMES<sub>c1074s</sub>, plasmid: pET28a

GGHHHHHAENLYFQSGMSIAEPNTEKRALCGICPAGCWVKVYDAGGRLSQVKADSSHLGMICTLGEHSADIVYSEHRLRYPMRRKPKGSYDFERISWDTAYD  
IIVDNLQKIKKESGPEATAVYTRGGSFELAMCDVFPKGVAVSSASVLPFGSPNTLGVGALCYVFSAMIAPHVTMGGMLINMFSDI ERAELIVVWGANPATD SPP  
LDFQRIVAAQKRGAQVQVVIDPRRTKTAQVTDQWIPVRPGTDGALALGCLNVLIEEELYDES FARDWTLGFDDFTRHVQHYPVEVVERITGVPAQTVQELARRIAAA  
NGAAPVMYSGLEYSNSGVQAIRATMALWALAGQLDVPGGRCFNMRDNTFPINREGLIPNPNEAKALGRDRFPVYSAYRGE SHAIALPEAVLNGDPYRIRSLIILGGS  
IITAWPQPD IWRKTLKTLDFLVTIDRQLTADSAYADIVLPATMYEIESYMTYGS MFRIREKVI EPVGEARNDF FIMAE LAKRLGYGHLYPQNEDELLRYVLKGS GF  
TPEEVRAKGGVLQKPTSILEYKWEKGLLRSDGQKGFDTPSGKFELASQFLAEHGYDPLPVYTEPTEGPLSRPDLAKEFPLVFNSSGSRVTTDFRSQHGGIPALNKRR  
REPQVTMNSADAGERGIKSGDWVRISTRRGSVVMRAYVTDIVAGSIDADMGGGGPVPQAWQKCNINDVTDLQNYDPISGFPVYKTLQCQVSKVESGKGTVDLDSG  
EASGTIADNNGRAAQPEFKRIYLDHNATTPIDPEVKVMREYLDAGQGNPSAIYHEGKESRF AVEAARRSVARLLNCTARRIVFTGGGSEANNLAIKG IAF AHEG  
KRNHII TSQIEHPAIRNTCKWLESRGFTVYLPVDQFGRVVRPHDLEKAI SDRTLLVSVMLANNETGSIQPVAELARIAHQHGAYMHTDAVQAVAKI PVDVNELEVDL  
LTLSGHAFYGPKGIGALYVRKDIPLTPLVHGGHESDLRAGTENVLAMVGLGAADLAVQRLPKMKKVEALRNHLEEE IKKI IPEARVNGHPVHRVPVTLNMTI PGM  
RGESLVLALDEKGLSLSSGSACRSGSPDPSALLAMGLSEEEAHCALRFLSGVKTAKDIERTLHLFEEVVTDAKTMVRF IPCR

>CaMES<sub>c1097s</sub>, plasmid: pET28a

GGHHHHHAENLYFQSGMSIAEPNTEKRALCGICPAGCWVKVYDAGGRLSQVKADSSHLGMICTLGEHSADIVYSEHRLRYPMRRKPKGSYDFERISWDTAYD  
IIVDNLQKIKKESGPEATAVYTRGGSFELAMCDVFPKGVAVSSASVLPFGSPNTLGVGALCYVFSAMIAPHVTMGGMLINMFSDI ERAELIVVWGANPATD SPP  
LDFQRIVAAQKRGAQVQVVIDPRRTKTAQVTDQWIPVRPGTDGALALGCLNVLIEEELYDES FARDWTLGFDDFTRHVQHYPVEVVERITGVPAQTVQELARRIAAA  
NGAAPVMYSGLEYSNSGVQAIRATMALWALAGQLDVPGGRCFNMRDNTFPINREGLIPNPNEAKALGRDRFPVYSAYRGE SHAIALPEAVLNGDPYRIRSLIILGGS  
IITAWPQPD IWRKTLKTLDFLVTIDRQLTADSAYADIVLPATMYEIESYMTYGS MFRIREKVI EPVGEARNDF FIMAE LAKRLGYGHLYPQNEDELLRYVLKGS GF  
TPEEVRAKGGVLQKPTSILEYKWEKGLLRSDGQKGFDTPSGKFELASQFLAEHGYDPLPVYTEPTEGPLSRPDLAKEFPLVFNSSGSRVTTDFRSQHGGIPALNKRR  
REPQVTMNSADAGERGIKSGDWVRISTRRGSVVMRAYVTDIVAGSIDADMGGGGPVPQAWQKCNINDVTDLQNYDPISGFPVYKTLQCQVSKVESGKGTVDLDSG  
EASGTIADNNGRAAQPEFKRIYLDHNATTPIDPEVKVMREYLDAGQGNPSAIYHEGKESRF AVEAARRSVARLLNCTARRIVFTGGGSEANNLAIKG IAF AHEG  
KRNHII TSQIEHPAIRNTCKWLESRGFTVYLPVDQFGRVVRPHDLEKAI SDRTLLVSVMLANNETGSIQPVAELARIAHQHGAYMHTDAVQAVAKI PVDVNELEVDL  
LTLSGHAFYGPKGIGALYVRKDIPLTPLVHGGHESDLRAGTENVLAMVGLGAADLAVQRLPKMKKVEALRNHLEEE IKKI IPEARVNGHPVHRVPVTLNMTI PGM  
RGESLVLALDEKGLSLSSGSACRSGSPDPSALLAMGLSEEEAHCALRFLSGVKTAKDIERTLHLFEEVVTDAKTMVRF IPCR

>CaMES<sub>c1135s</sub>, plasmid: pET28a

GGHHHHHAENLYFQSGMSIAEPNTEKRALCGICPAGCWVKVYDAGGRLSQVKADSSHLGMICTLGEHSADIVYSEHRLRYPMRRKPKGSYDFERISWDTAYD  
IIVDNLQKIKKESGPEATAVYTRGGSFELAMCDVFPKGVAVSSASVLPFGSPNTLGVGALCYVFSAMIAPHVTMGGMLINMFSDI ERAELIVVWGANPATD SPP  
LDFQRIVAAQKRGAQVQVVIDPRRTKTAQVTDQWIPVRPGTDGALALGCLNVLIEEELYDES FARDWTLGFDDFTRHVQHYPVEVVERITGVPAQTVQELARRIAAA  
NGAAPVMYSGLEYSNSGVQAIRATMALWALAGQLDVPGGRCFNMRDNTFPINREGLIPNPNEAKALGRDRFPVYSAYRGE SHAIALPEAVLNGDPYRIRSLIILGGS  
IITAWPQPD IWRKTLKTLDFLVTIDRQLTADSAYADIVLPATMYEIESYMTYGS MFRIREKVI EPVGEARNDF FIMAE LAKRLGYGHLYPQNEDELLRYVLKGS GF  
TPEEVRAKGGVLQKPTSILEYKWEKGLLRSDGQKGFDTPSGKFELASQFLAEHGYDPLPVYTEPTEGPLSRPDLAKEFPLVFNSSGSRVTTDFRSQHGGIPALNKRR  
REPQVTMNSADAGERGIKSGDWVRISTRRGSVVMRAYVTDIVAGSIDADMGGGGPVPQAWQKCNINDVTDLQNYDPISGFPVYKTLQCQVSKVESGKGTVDLDSG  
EASGTIADNNGRAAQPEFKRIYLDHNATTPIDPEVKVMREYLDAGQGNPSAIYHEGKESRF AVEAARRSVARLLNCTARRIVFTGGGSEANNLAIKG IAF AHEG  
KRNHII TSQIEHPAIRNTCKWLESRGFTVYLPVDQFGRVVRPHDLEKAI SDRTLLVSVMLANNETGSIQPVAELARIAHQHGAYMHTDAVQAVAKI PVDVNELEVDL  
LTLSGHAFYGPKGIGALYVRKDIPLTPLVHGGHESDLRAGTENVLAMVGLGAADLAVQRLPKMKKVEALRNHLEEE IKKI IPEARVNGHPVHRVPVTLNMTI PGM  
RGESLVLALDEKGLSLSSGSACRSGSPDPSALLAMGLSEEEAHCALRFLSGVKTAKDIERTLHLFEEVVTDAKTMVRF IP

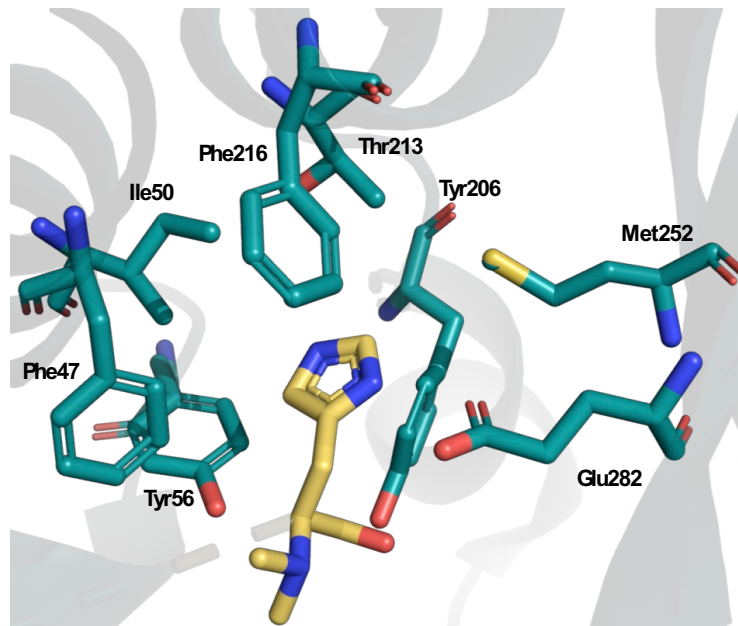

```

A0A3A4NKW8 MRSQADPSKINELPACVAIALNGGDSAIIDAAEEAN-----PVLDFAHSAARTLSENPKW
4PIO -----GHMALSLANYLAADSAAEAL-----RRDVRAGLTATQKS
A0A7V4UF19 -----MSTNLSIADTAILERFEEILLARPVHKNAFITDVQNGLSASPKT
          * . . : : * . . * : . *

A0A3A4NKW8 MECRFLYDARGSALEFQICRQPEYYPTRRETAILHRYAGEICETTGCVT-LAELGCGSAI
4PIO LPPKWFYDAVGSDFDQITRLPEYYPTRTEAQILRTRSAEIIISAAGADT-LVELGSGTSE
A0A7V4UF19 LPCIYFYDERGSQLFEDICRLPEYYLTRCEAEILRQHSREIAASFPADTLLVELGSGSSV
: : : ** * * * : * * * * * * * : * * . : * * : . * * . * * . * : :

A0A3A4NKW8 KTRHILSAYVKSNGSVRYVPVDVSRALQHACAAITAWHPAVKVAGIRGTYECAFPFLKA
4PIO KTRMLLDAMRDAELLRRFIPFDVDAGVLRSAAGAI GA EYPGIEIDAVCGDFEEHLGKIPH
A0A7V4UF19 KTRYLLEAFMERHGQALYNPIDISHSILRQSALELLAHYPELKITAVAATYQEGLRITD
*** : * * . : * * . . * . : : * * * : : . . : : :

A0A3A4NKW8 LSP--VMVFLFGSTIGNLNEDQDRLFWRNIGRHLSEGDFLLGVLDLVKDT SILEAAYNDR
4PIO VGR--RLVFLFGSTIGNLTPAPRAEFLSTLADTLQPGDSL L LGTDLVKDTGR L VRAYDDA
A0A7V4UF19 I PARTRLIMWLGSSIGNLGRQEAVEFLGQLRGIMKPDHLLIGIDLKKDINILKPAYDDA
: : : : * * * : * * * * * * * : : . * : * * * * * . * * * *

A0A3A4NKW8 AGVSAAF TLNLFERMNRELKTGIDVLHLQH VAYFSSAKSRIEIFAQFNREQRVRIKPLNK
4PIO AGVTAAFN RNVLAVVNRELSADFDLDAFEHVAKWNSDEERIE MWLRARTAQHVRVAALDL
A0A7V4UF19 QGVTAAFNLNVLERMNRELVADFDLNAFAHLCRYNEEQGRIEMHILSLKDQIVRFRQPAF
* * : * * . * : : : * * * : : * : : . . : * * : * * * .

A0A3A4NKW8 SIPISAGERIQVEISRKFNLNELVPRLYSCGFATRIFSDENSWFALLLLEKVAND
4PIO EVDFAAGEEMLTEV SCKFRPENVAELAEAGLRQTHWWDTPAGDFGLSLA--VR--
A0A7V4UF19 RVAFDQGETIHTENSHKYAPAQIQTLARRSGLRIVKQWFD SRKWFSLNLL--AASE
: : * * : . * * * : : . . * : . : * * * * .

```

**Figure S1. Top:** the crystal structure of EgtD from *M. smegmatis* in complex with the reaction intermediate *Na,N*-dimethylhistidine (yellow, PDB: 4PIO)<sup>1</sup>. Residues in direct contact with the substrate are shown in stick representation (teal). **Bottom:** Sequence alignment of EgtD from *M. smegmatis* and the homologous methyltransferase from *Candidatus Abyssobacterium* *bacterium* (UniProt A0A3A4NKW8) and *Caldithrix abyssii* (A0A7V4UF19). Most active site residues are conserved (green), or very similar.

**Table S1.** List of species with a gene that encodes MES homologs with the catalytic residues Cys153, Lys952, Cys1074, Cys1097 and Cys1135 conserved (CaMES numbering).

| UniProt ID | Organism                                          | Phylum                    |
|------------|---------------------------------------------------|---------------------------|
| A0A399XDS8 | <i>Acidobacteria bacterium</i>                    | Acidobacteria             |
| A0A6A0IP45 | <i>Acidobacteria bacterium</i>                    | Acidobacteria             |
| A0A6G0A229 | <i>Actinobacteria bacterium</i>                   | Actinobacteria            |
| A0A523V0G2 | <i>Actinobacteria bacterium</i>                   | Actinobacteria            |
| A0A3M1PJS3 | <i>Calditrichaeota bacterium</i>                  | Calditrichaeota           |
| A0A3M2FG68 | <i>Calditrichaeota bacterium</i>                  | Calditrichaeota           |
| A0A6H9L4H4 | <i>Calditrichaeota bacterium</i>                  | Calditrichaeota           |
| A0A7V4WV16 | <i>Caldithrix abyssi</i>                          | Calditrichaeota           |
| A0A3A4NVY7 | <i>Candidatus Abyssubacteria bacterium SURF_5</i> | Candidatus Abyssubacteria |
| A0A524AS98 | <i>Dehalococcoidia bacterium</i>                  | Chloroflexi               |
| A0A523UH11 | <i>Dehalococcoidia bacterium</i>                  | Chloroflexi               |
| A0A2D6J0S4 | <i>Dehalococcoidales bacterium</i>                | Chloroflexi               |
| A0A523SK89 | <i>Dehalococcoidia bacterium</i>                  | Chloroflexi               |
| A0A7J4FR07 | <i>Methanosarcinales archaeon</i>                 | Euryarchaeota             |
| A0A7K4BI03 | <i>Methanomicrobiales archaeon</i>                | Euryarchaeota             |
| A0A7K4DD47 | <i>Methanomicrobiales archaeon</i>                | Euryarchaeota             |
| A0A1V6KBG7 | <i>Euryarchaeota archaeon ADurb.Bin009</i>        | Euryarchaeota             |
| A0A843KNK4 | <i>Methanoculleus sp.</i>                         | Euryarchaeota             |
| A0A498H2I6 | <i>Methanoculleus taiwanensis</i>                 | Euryarchaeota             |
| A0A2D5ZQU6 | <i>Gemmatimonadetes bacterium</i>                 | Gemmatimonadetes          |
| A0A0S8G1P3 | <i>Gemmatimonas sp. SG8_38_2</i>                  | Gemmatimonadetes          |
| A0A0S8HDI0 | <i>Gemmatimonas sp. SM23_52</i>                   | Gemmatimonadetes          |
| A0A7V1AJK2 | <i>Nitrospirae bacterium</i>                      | Nitrospirae               |
| A0A1G1GVX5 | <i>Nitrospirae bacterium GWC2_57_9</i>            | Nitrospirae               |
| A0A523NF38 | <i>Planctomycetes bacterium</i>                   | Planctomycetes            |
| I3IKG5     | <i>Candidatus Jettenia caeni</i>                  | Planctomycetes            |
| A0A6L3AHQ7 | <i>Candidatus Jettenia sp. AMX1</i>               | Planctomycetes            |
| A0A533Q600 | <i>Candidatus Jettenia ecosi</i>                  | Planctomycetes            |
| A0A5C6DKM7 | <i>Candidatus Brocadiaceae bacterium S225</i>     | Planctomycetes            |
| A0A2C9CAM6 | <i>Kuenenia stuttgartiensis</i>                   | Planctomycetes            |
| A0A6G7GT36 | <i>Kuenenia stuttgartiensis</i>                   | Planctomycetes            |
| A0A0B0EG58 | <i>Candidatus Scalindua brodae</i>                | Planctomycetes            |
| A0A286U2N3 | <i>Candidatus Scalindua japonica</i>              | Planctomycetes            |
| Q1Q5D6     | <i>Kuenenia stuttgartiensis</i>                   | Planctomycetes            |
| A0A523CMZ8 | <i>Candidatus Scalindua sp. AMX11</i>             | Planctomycetes            |
| A0A7Y3ULB5 | <i>Planctomycetes bacterium</i>                   | Planctomycetes            |
| A0A3A4XW55 | <i>Desulfobacteraceae bacterium</i>               | Proteobacteria            |
| A0A7C1TE37 | <i>Gammaproteobacteria bacterium</i>              | Proteobacteria            |
| A0A2A5HFC2 | <i>Alteromonadaceae bacterium</i>                 | Proteobacteria            |
| A0A1W7QPD6 | <i>Geobacter pelophilus</i>                       | Proteobacteria            |
| A0A6F9X0J6 | <i>Geobacter sp. SVR</i>                          | Proteobacteria            |
| C6E0P4     | <i>Geobacter sp. (strain M21)</i>                 | Proteobacteria            |

|            |                                                                        |                |
|------------|------------------------------------------------------------------------|----------------|
| A0A523K4L2 | <i>Gammaproteobacteria bacterium</i>                                   | Proteobacteria |
| A0A450YCV5 | <i>Candidatus Kentron sp. SD</i>                                       | Proteobacteria |
| A0A450YII0 | <i>Candidatus Kentron sp. SD</i>                                       | Proteobacteria |
| A0A451BQ29 | <i>Candidatus Kentron sp. SD</i>                                       | Proteobacteria |
| B5E8L6     | <i>Geobacter bemidjiensis</i> (strain Bem / ATCC BAA-1014 / DSM 16622) | Proteobacteria |
| A0A257SS02 | <i>Chromatiales bacterium 21-64-14</i>                                 | Proteobacteria |
| B9M6I9     | <i>Geobacter daltonii</i> (strain DSM 22248 / JCM 15807 / FRC-32)      | Proteobacteria |
| I4C6F5     | <i>Desulfomonile tiedjei</i> (strain ATCC 49306 / DSM 6799 / DCB-1)    | Proteobacteria |
| A0A450U8Z3 | <i>Candidatus Kentron sp. LFY</i>                                      | Proteobacteria |
| A0A450U507 | <i>Candidatus Kentron sp. LFY</i>                                      | Proteobacteria |
| A0A450W825 | <i>Candidatus Kentron sp. LFY</i>                                      | Proteobacteria |
| A0A1F3Y2H8 | <i>Bdellovibrionales bacterium RIFOXYD1_FULLL_55_31</i>                | Proteobacteria |
| A0A3C0YC61 | <i>Polaromonas sp.</i>                                                 | Proteobacteria |
| A0A6P1DUA6 | <i>Thiorhodococcus mannitoliphagus</i>                                 | Proteobacteria |
| L0GVW7     | <i>Thioflaviccoccus mobilis</i> 8321                                   | Proteobacteria |
| A0L7Z7     | <i>Magnetococcus marinus</i> (strain ATCC BAA-1437 / JCM 17883 / MC-1) | Proteobacteria |
| A0A6V8MUX4 | <i>Geomonas paludis</i>                                                | Proteobacteria |
| A0A7C1TU51 | <i>Gammaproteobacteria bacterium</i>                                   | Proteobacteria |
| A0A3A5AAI7 | <i>Desulfobacteraceae bacterium</i>                                    | Proteobacteria |
| A0A2N2H090 | <i>Deltaproteobacteria bacterium HGW-Deltaproteobacteria-21</i>        | Proteobacteria |
| A0A0F2R6L8 | <i>Desulfatitalea sp. BRH_c12</i>                                      | Proteobacteria |
| A0A2N2KCG5 | <i>Deltaproteobacteria bacterium HGW-Deltaproteobacteria-15</i>        | Proteobacteria |
| A0A451AXR2 | <i>Candidatus Kentron sp. UNK</i>                                      | Proteobacteria |
| A0A3D3G9C8 | <i>Bdellovibrionales bacterium</i>                                     | Proteobacteria |
| A0A450WRK2 | <i>Candidatus Kentron sp. LPFa</i>                                     | Proteobacteria |
| A0A0K9I9K1 | <i>Desulfocarbo indianensis</i>                                        | Proteobacteria |
| A0A212PG69 | <i>Geobacter sp. DSM 9736</i>                                          | Proteobacteria |
| A0A1V5H0L3 | <i>Deltaproteobacteria bacterium ADurb.BinA179</i>                     | Proteobacteria |
| A0A1F3T9T9 | <i>Bdellovibrionales bacterium GWB1_55_8</i>                           | Proteobacteria |
| A0A6M0JW57 | <i>Thiorhodococcus minor</i>                                           | Proteobacteria |
| A0A1S7LH69 | <i>Magnetococcus massalia</i> (strain MO-1)                            | Proteobacteria |
| A0A0S8CVX0 | <i>Desulfobacterales bacterium SG8_35_2</i>                            | Proteobacteria |
| A0A2N6C8B1 | <i>Desulfobulbaceae bacterium</i>                                      | Proteobacteria |
| A0A1G5QK56 | <i>Thiohalomonas denitrificans</i>                                     | Proteobacteria |
| A0A2H6K442 | <i>bacterium BMS3Abin01</i>                                            |                |
| A0A2H6JEA0 | <i>bacterium BMS3Bbin12</i>                                            |                |
| A0A3B1C0R1 | <i>hydrothermal vent metagenome</i>                                    |                |
| A0A2H6F6M9 | <i>bacterium BMS3Abin06</i>                                            |                |
| A0A2H6ED39 | <i>bacterium BMS3Abin03</i>                                            |                |
| A0A485M3T7 | <i>anaerobic digester metagenome</i>                                   |                |
| A0A3B0YYM1 | <i>hydrothermal vent metagenome</i>                                    |                |
| A0A3B0Z7Q1 | <i>hydrothermal vent metagenome</i>                                    |                |

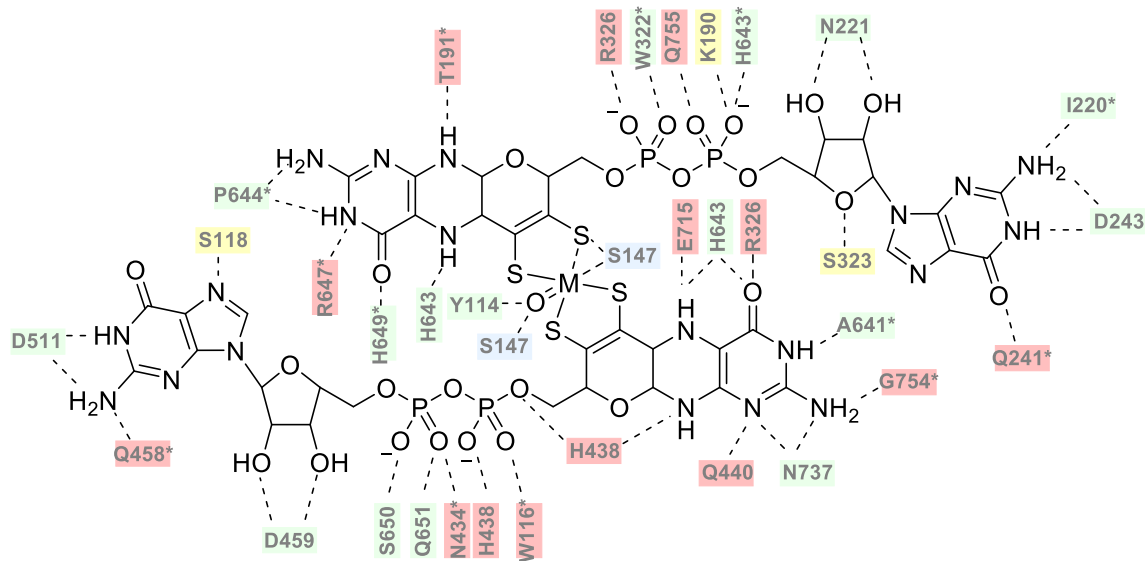

\* - interaction with the peptide backbone atoms

|                    |                            |               |               |         |          |                   |           |         |
|--------------------|----------------------------|---------------|---------------|---------|----------|-------------------|-----------|---------|
| DMSoreductase      | MTKLSGQELHAELSRRAFLSYTAAV  | GALGIC        | CGTSLLAQ      | GARA    | EGLANGEV | MSG               | CHWGVFK   | 60      |
| AcetyleneHydratase | -----                      | MASKKHVV      | QSCDI         | -----   | NCVV     | ---               | E         | 19      |
| hvMES              | -----                      | MDKRTLWKKGI   | CGICPA        | -----   | GCWI     | ---               | E         | 23      |
| EaMES              | -----                      | MHTVQGERRAL   | CGICSA        | -----   | CGV      | ---               | I         | 23      |
| CaMES              | -----                      | MSIAEPNTEKRAL | CGICPA        | -----   | GCWV     | ---               | K         | 24      |
| AbMES              | MTEISTQLAP                 | -----         | QQDSPAEQIKDGL | CGICPA  | -----    | GCWV              | ---       | R       |
|                    |                            |               |               |         |          |                   |           | *       |
| DMSoreductase      | ARVE-NGRAVAFEPWDKDPAPSHQLP | -----         | GVLD          | SIYSP   | TRIKYPMV | RREFLEKGVN        |           | 112     |
| AcetyleneHydratase | AEVKADGKIQTKSI             | --SEPH        | TPPN          | SICMKS  | SVNADT   | IRTHKDRVLYPLKNV   | -----     | 69      |
| hvMES              | AGMQ-AGKMDIR               | -----         | ADTSH         | QLGMIC  | RRGQHAP  | EIIYSEQR          | LRKYPLKRV | 69      |
| EaMES              | VAYDDHGRIASVR              | -----         | PDEDA         | EIGIIC  | RLEASPE  | IVYSSDRVLYPLRRA   | -----     | 70      |
| CaMES              | VKYDAGGRLSQVK              | -----         | ADSS          | HLGMIC  | TLGHSAD  | IVYSEHRLRYP       | PMRRK     | 71      |
| AbMES              | VRLN-GGRMSGVK              | -----         | ALPD          | HPLGMIC | TIGKHS   | PQIVHDPNRLQYPLRRT | -----     | 80      |
|                    |                            |               |               |         |          |                   |           | *       |
|                    |                            |               |               |         |          |                   |           | *       |
| DMSoreductase      | ADRSTRGN                   | DFVRVTW       | DEALDL        | VAREL   | KRVQES   | YGPTGT            | FGGS      | Y       |
| AcetyleneHydratase | --GSKRGE                   | QWERIS        | WDQAL         | DEIAE   | KLKII    | IAYK              | PESLG     | --VSQTE |
| hvMES              | --GPK-GK                   | HAFERIS       | WDEAY         | DCIV    | KNLNAI   | KAESG             | PEAVS     | --IY    |
| EaMES              | --GPK-GT                   | HAFERIT       | WDEAY         | ETIV    | ANLTRI   | REESG             | PEAVA     | --IY    |
| CaMES              | --GPK-GS                   | YDFERIS       | WDTAY         | DI      | VDNLQ    | KIKKES            | GPEATA    | --VY    |
| AbMES              | --GPK-GS                   | YDFERIT       | WNEAME        | AIAG    | KLDDI    | KREHG             | PEATA     | --IY    |
|                    |                            |               |               |         |          |                   |           | *       |
|                    |                            |               |               |         |          |                   |           | *       |
| DMSoreductase      | RALN--LAG                  | GFVN          | SSGDY         | -----   | STAA     | QIIM              | PHVM      | G       |
| AcetyleneHydratase | SE--YGT                    | LRFM          | NLLG          | SPN     | WTSAMY   | CIGN              | TAG       | -VHR    |
| hvMES              | KDVAVSS                    | ASNIL         | FPFG          | SPNT    | MVGAL    | CYVS              | FAMI      | APD     |
| EaMES              | KGVAVSS                    | ASSV          | LF            | FPFG    | SPNT     | MVGAL             | CYVS      | FAMI    |
| CaMES              | KGVAVSS                    | ASSV          | LF            | FPFG    | SPNT     | MVGAL             | CYVS      | FAMI    |
| AbMES              | RGVAVSS                    | ASSV          | LF            | FPFG    | SPNT     | MVGAL             | CYVS      | FAMI    |
|                    |                            |               |               |         |          |                   |           | *       |
|                    |                            |               |               |         |          |                   |           | *       |
| DMSoreductase      | MVFWAAD                    | PKTNE         | I             | GWV     | IPDH     | GAYAG             | M         | K       |
| AcetyleneHydratase | LLFIGK                     | NLSN          | NHW           | -----   | SQF      | N                 | L         | K       |
| hvMES              | LFVWGA                     | NPAT          | D             | SPP     | -----    | LD                | M         | R       |
| EaMES              | ILVWGT                     | NPAT          | D             | CPP     | -----    | L                 | L         | R       |
| CaMES              | IVVWGA                     | NPAT          | D             | SPP     | -----    | L                 | D         | F       |
| AbMES              | IVVWGA                     | NPAT          | D             | SPP     | -----    | L                 | A         | H       |
|                    |                            |               |               |         |          |                   |           | *       |
|                    |                            |               |               |         |          |                   |           | *       |
| DMSoreductase      | QTDV                       | ALML          | GMAHT         | LYSE    | DLHDK    | DFLEN             | CTT       | G       |
| AcetyleneHydratase | GTDAAL                     | FLGM          | IN            | VI      | INEQ     | LYD               | KEF       | V       |
| hvMES              | GTDGAL                     | LALS          | M             | MG      | V        | L                 | I         | D       |
| EaMES              | GTDGAL                     | LAL           | GL            | N       | V        | IAE               | E         | L       |
| CaMES              | GTDGAL                     | LAL           | GL            | C       | N        | V                 | L         | I       |
| AbMES              | GTDGAL                     | LAL           | GL            | M       | I        | N                 | V         | L       |
|                    |                            |               |               |         |          |                   |           | *       |
|                    |                            |               |               |         |          |                   |           | *       |
| DMSoreductase      | AEQIRE                     | LARS          | FV            | AG      | R        | T                 | M         | L       |
| AcetyleneHydratase | AGEIRK                     | AAV           | M             | F       | A        | T                 | E         | S       |
| hvMES              | ADKIRE                     | LARR          | I             | A       | R        | T                 | A         | G       |
| EaMES              | AETVAS                     | LARR          | I             | A       | R        | A                 | R         | G       |





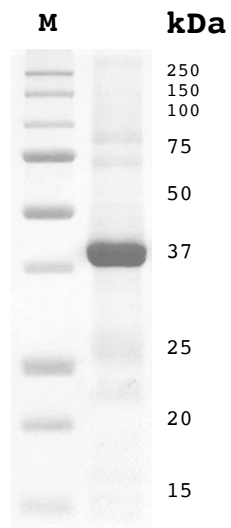

**Figure S3.** SDS PAGE of purified *CaMES<sub>C-term</sub>*. M – molecular weight marker.

### Desulfurase activity of *CaMES<sub>C-term</sub>*

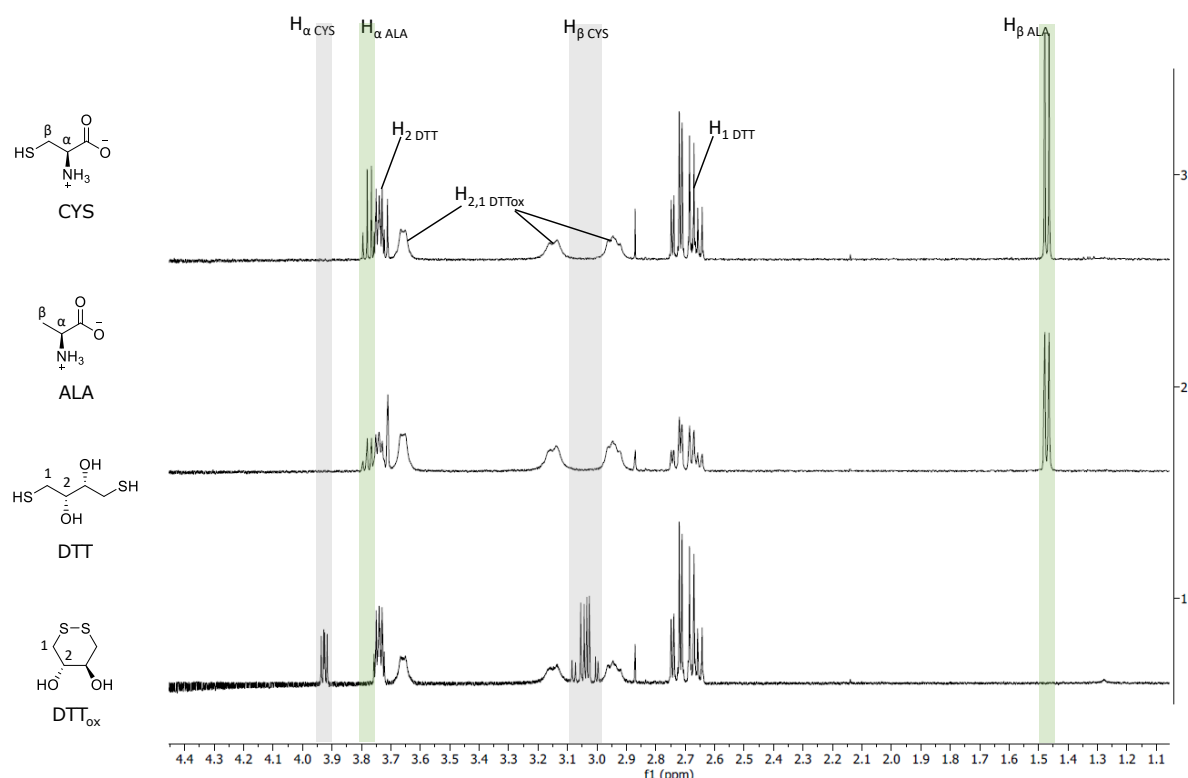

**Figure S4.** The product of cysteine consumption catalyzed by *CaMES<sub>C-term</sub>*, was examined by <sup>1</sup>H-NMR (500 Hz, D<sub>2</sub>O). 3 μM of *CaMES<sub>C-term</sub>* was incubated with 0.5 mM of cysteine, 2 mM of DTT in phosphate buffer (50 mM, pH 8.0) at 25°C overnight. The samples were lyophilized, dissolved in D<sub>2</sub>O, and analyzed by <sup>1</sup>H-NMR (top spectrum). As control we also analyzed samples containing alanine (the expected product) and DTT (middle spectrum) or cysteine and DTT (bottom spectrum). Comparison of these spectra identifies alanine as the product of cysteine consumption catalyzed by *CaMES<sub>C-term</sub>*.

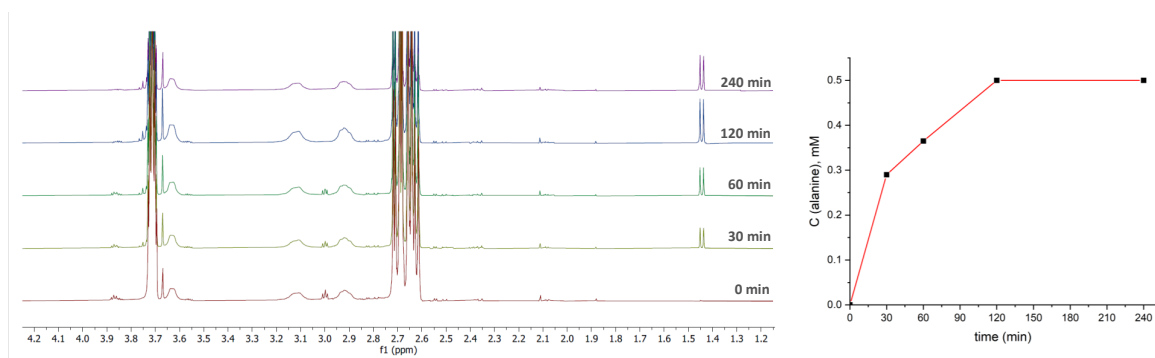

**Figure S5.** The rate alanine production by *CaMES<sub>C-term</sub>* was quantified as follows: reactions containing of 0.5 mM cysteine, 10 mM DTT, 2 μM of *CaMES<sub>C-term</sub>* in phosphate buffer (50 mM, pH 8.0) were incubated at 25°C for 0, 30, 60, 120, or 240 min. The samples were frozen, lyophilized, dissolved in D<sub>2</sub>O, and analyzed by <sup>1</sup>H-NMR (left). The concentration of alanine in these reactions was estimated from the integrals of the chemical shifts at 1.45-1.42 ppm. A plot of these values against time shows that *CaMES<sub>C-term</sub>*-catalyzed conversion of 0.5 mM cysteine to alanine is complete within 2 h (right)

## Characterization of full-length MES in recombinant *E. coli*

**Table S2.** Growing media recipes.

|                                                                                                                                                                                                                                                                                                                                                                                                                                                                                                                                                                                                                                                                                                                                       |
|---------------------------------------------------------------------------------------------------------------------------------------------------------------------------------------------------------------------------------------------------------------------------------------------------------------------------------------------------------------------------------------------------------------------------------------------------------------------------------------------------------------------------------------------------------------------------------------------------------------------------------------------------------------------------------------------------------------------------------------|
| <p><b><i>Luria-Bertani (LB) medium, per 100 mL of H<sub>2</sub>O, autoclaved:</i></b></p> <p>1 g tryptone<br/>0.5 g yeast extract<br/>1 g NaCl</p>                                                                                                                                                                                                                                                                                                                                                                                                                                                                                                                                                                                    |
| <p><b><i>Chemically defined (CD) medium, per 100 mL of H<sub>2</sub>O:</i></b></p> <p>20 mL 5X M9 salts<br/> <i>5X M9: 34 g/L Na<sub>2</sub>HPO<sub>4</sub>, 15 g/L KH<sub>2</sub>PO<sub>4</sub>, 2.5 g/L NaCl, 5.0 g/L NH<sub>4</sub>Cl, autoclaved</i></p> <p>2 mL 50X mixture of amino acids<br/> <i>50X amino acids: 10g/L each amino acid, sterile filtered</i><br/> <i>(Met and Tyr are added separately, 20 mg dissolved in water and sterile filtered)</i></p> <p>1 mL 40% glucose, autoclaved<br/> 100 <math>\mu</math>L 2M MgSO<sub>4</sub>, autoclaved<br/> 100 <math>\mu</math>L 100 mM CaCl<sub>2</sub>, autoclaved<br/> 1 mL 100X MEM vitamin solution (Pan Biotech), sterile<br/> sterile H<sub>2</sub>O to 100 mL</p> |

**Table S3.** Calculated and observed *m/z* values of ergothioneine.

| compound                                                                      | short name              | <i>m/z</i> , calculated | <i>m/z</i> , observed |
|-------------------------------------------------------------------------------|-------------------------|-------------------------|-----------------------|
| Ergothioneine                                                                 | ERG                     | 230.0958                | 230.0958              |
| F-ergothioneine                                                               | F-ERG                   | 248.0864                | 248.0861              |
| <sup>34</sup> S-ergothioneine                                                 | S-ERG                   | 232.0916                | 232.0916              |
| D <sub>4</sub> - <sup>15</sup> N <sub>3</sub> -ergothioneine                  | DN-ERG (“heavy”)        | 237.1120                | 237.1123              |
| D <sub>4</sub> - <sup>15</sup> N <sub>3</sub> - <sup>34</sup> S-ergothioneine | DNS-ERG (“super heavy”) | 239.1078                | 239.1078              |
| <sup>13</sup> C <sub>6</sub> - <sup>15</sup> N <sub>3</sub> -ergothioneine    | CN-ERG                  | 239.1071                | 239.1063              |
| D <sub>6</sub> -ergothioneine                                                 | D-ERG                   | 236.1340                | 236.1335              |
| trimethylhistidine                                                            | TMH                     | 198.1238                | 198.1239              |
| <i>N</i> $\alpha$ -F-trimethylhistidine                                       | F-TMH                   | 216.1143                | 216.1141              |
| D <sub>5</sub> - <sup>15</sup> N <sub>3</sub> - trimethylhistidine            | DN-TMH                  | 206.1462                | 206.1460              |

## Characterization of MES activity

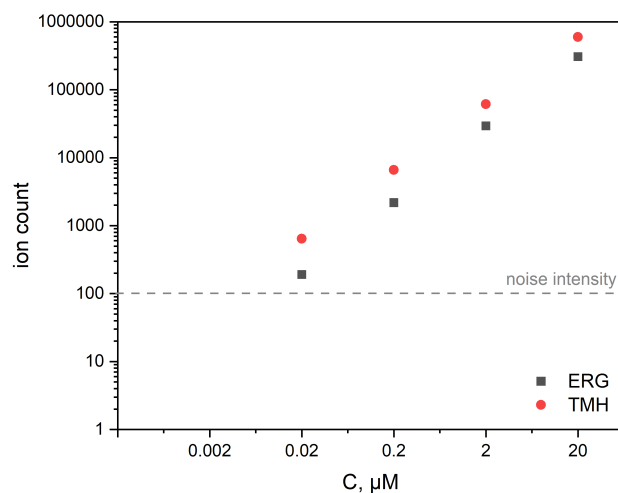

**Figure S6.** The calibration curve and detection limit of ergothioneine (ERG) and trimethylhistidine (TMH) by RP-HPLC ESI-HR-MS. ERG and TMH concentrations varied between 2 nM to 20 μM. The detection limit is determined as 20 nM.

**Table S4.** Concentration of ergothioneine and TMH in growth media, additives and untransformed *E. coli*.<sup>a</sup>

| entry |                                   | ERG content | TMH content |
|-------|-----------------------------------|-------------|-------------|
| 1     | LB, 1 X                           | < 20 nM     | 333 ± 21 nM |
| 2     | CD, 1 X                           | < 20 nM     | < 20 nM     |
| 3     | Vitamin mix, 1 X                  | < 20 nM     | < 20 nM     |
| 4     | Amino acids mix, 1 X              | < 20 nM     | < 20 nM     |
| 5     | <i>E. coli</i> grown in LB medium | < 20 nM     | 110 ± 20 nM |
| 6     | <i>E. coli</i> grown in CD medium | < 20 nM     | 67 ± 6 nM   |

<sup>a</sup> Concentrations of ergothioneine and TMH were estimated by HR-ESI-MS based on the external calibration. All measurements were done in triplicates. Analyzed samples were: entry 1) LB medium; 2) chemically defined medium; 3) mixture of added vitamins in 1 x concentration; 4) amino acid mix in 1 x concentration; 5) Cell-free extracts of *E. coli* Δmtn grown in LB medium for 20 h at 25°C. 6) Cell-free extracts of *E. coli* Δmtn grown in CD medium for 20 h at 25°C. These results show that the growth media did not contain detectable amounts of endogenous ergothioneine. *E. coli* cells that do not contain any recombinant ergothioneine biosynthetic enzyme do not accumulate or produce detectable amounts of ergothioneine.

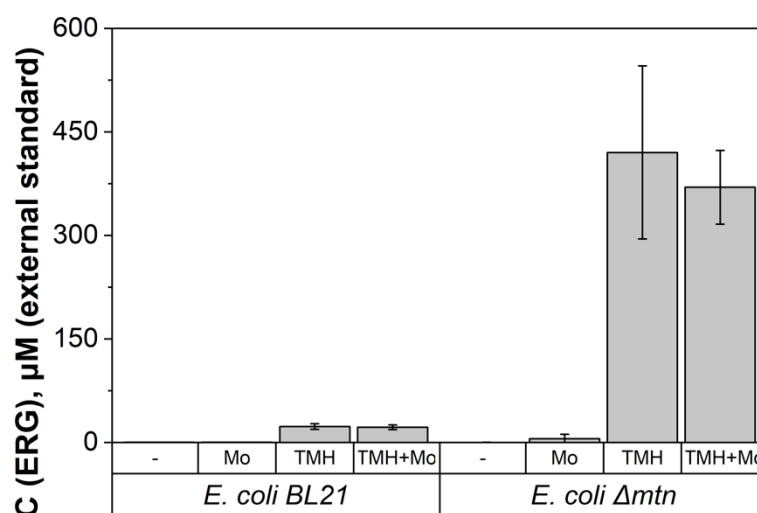

|                         | <i>E. coli</i> K12 ( $\Delta\text{mtn}$ ) |                          | <i>E. coli</i> BL21         |                             |
|-------------------------|-------------------------------------------|--------------------------|-----------------------------|-----------------------------|
|                         | No metal                                  | + $\text{MoO}_4^{2-}$    | No metal                    | + $\text{MoO}_4^{2-}$       |
| <b>CaMES</b>            | $0.08 \pm 0.09 \mu\text{M}$               | $5 \pm 7 \mu\text{M}$    | $0.13 \pm 0.01 \mu\text{M}$ | $0.14 \pm 0.02 \mu\text{M}$ |
| <b>CaMES + 1 mM TMH</b> | $420 \pm 130 \mu\text{M}$                 | $370 \pm 50 \mu\text{M}$ | $23.0 \pm 4 \mu\text{M}$    | $22.0 \pm 4 \mu\text{M}$    |

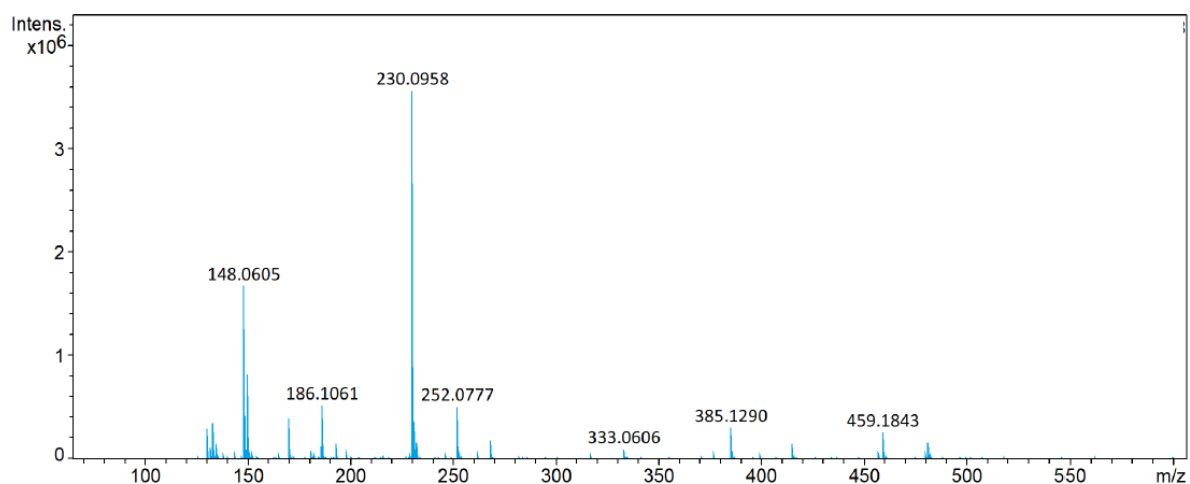

**Figure S7.** Ergothioneine production by CaMES in *E. coli* BL21 and *E. coli*  $\Delta\text{mtn}$  strains grown in CD media supplemented with  $10 \mu\text{M}$   $\text{Na}_2\text{MoO}_4$  (+ Mo) and/or 1 mM TMH for 20 h at  $25^\circ\text{C}$ . Maximal ergothioneine content in lysate of *E. coli* BL21 cells was estimated as  $20 \mu\text{M}$ ; maximal ergothioneine content in lysate of *E. coli*  $\Delta\text{mtn}$  cells was estimated as  $400 \mu\text{M}$  (based on external standard). Analysis was done in triplicate and standard deviation is shown. Example of the obtained mass spectra is shown.

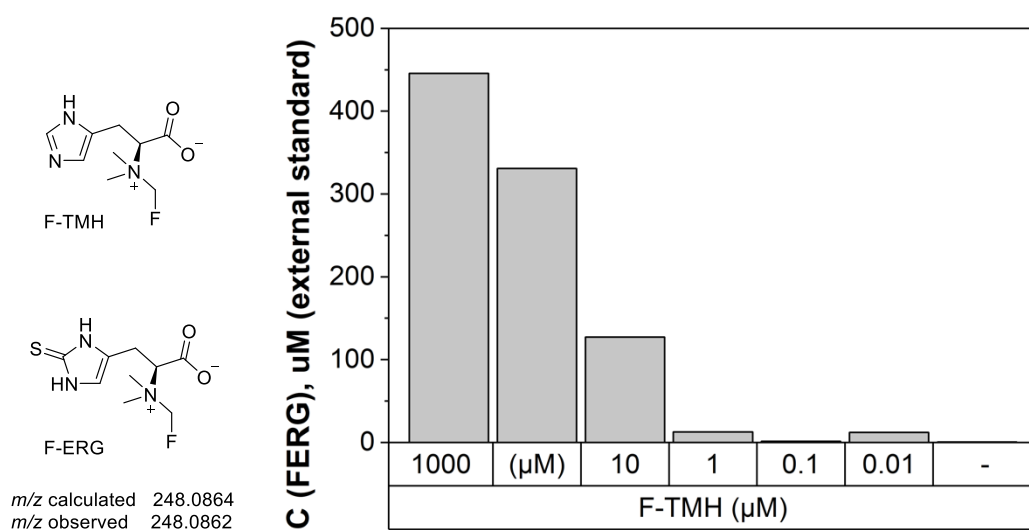

|            | C (F-TMH added to media), $\mu\text{M}$ |     |    |     |     |      |
|------------|-----------------------------------------|-----|----|-----|-----|------|
|            | -                                       | 0.1 | 1  | 10  | 100 | 1000 |
| CaMES + Mo | 0.4                                     | 1.2 | 13 | 130 | 330 | 450  |

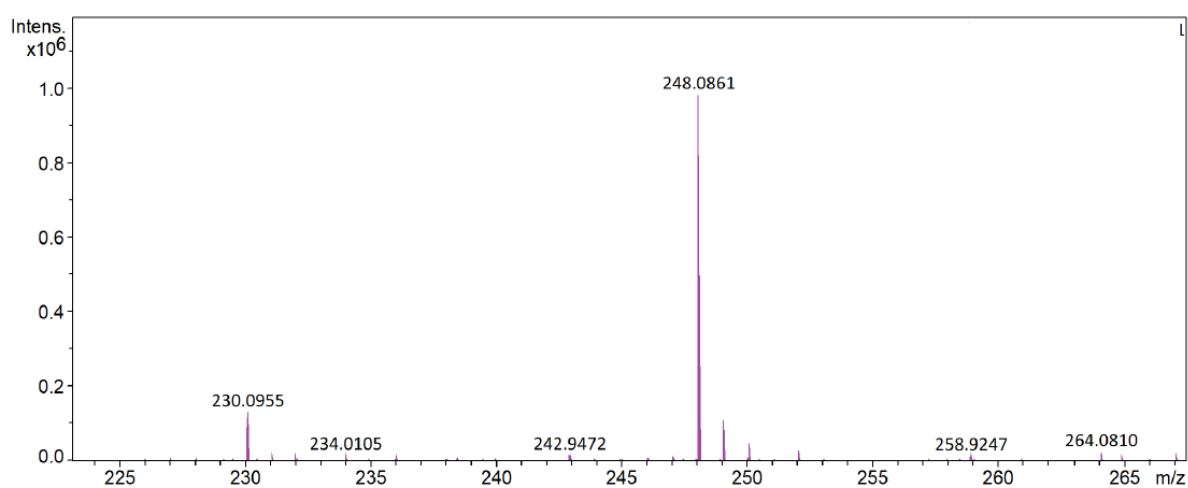

**Figure S8. Top left:** Structures of *N* $\alpha$ -methyl fluorinated TMH (F-TMH) and *N* $\alpha$ -methyl fluorinated ergothioneine (F-ERG). **Top Right:** Production of F-ERG by CaMES from in *E. coli*  $\Delta\text{mtn}$  grown in CD media supplemented with 10  $\mu\text{M}$   $\text{Na}_2\text{MoO}_4$  and 0.1- $\mu\text{M}$ -1000  $\mu\text{M}$  of F-TMH for 20 h at 25°C. F-ergothioneine content was estimated based on external ergothioneine standard. The signal at 230.0995 corresponds to ergothioneine (produced from endogenous TMH) at a similar level as observed in cells that were not supplemented with TMH (Figure S7). These measurements were done only once. **Bottom:** Example of the obtained mass spectra is shown.

A.

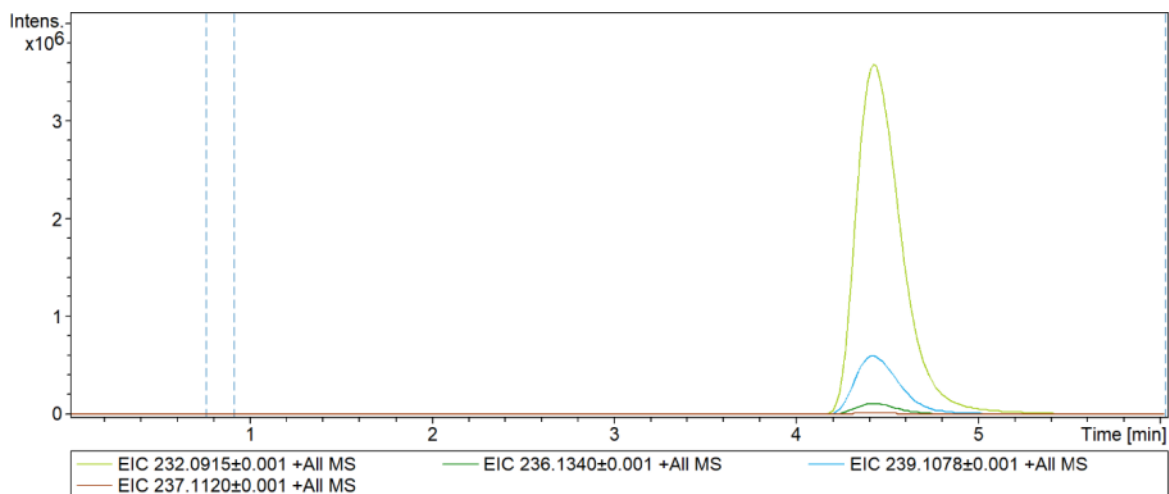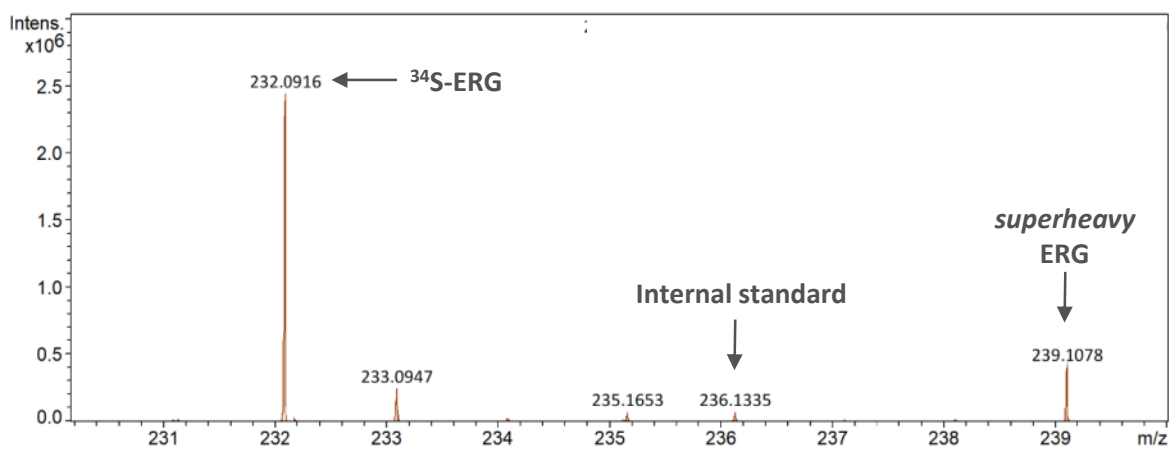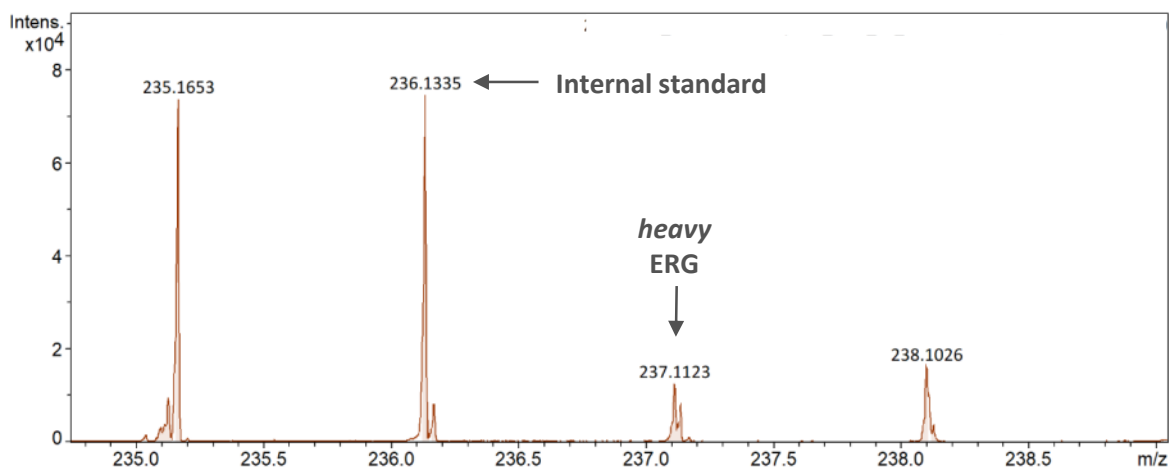

**B.**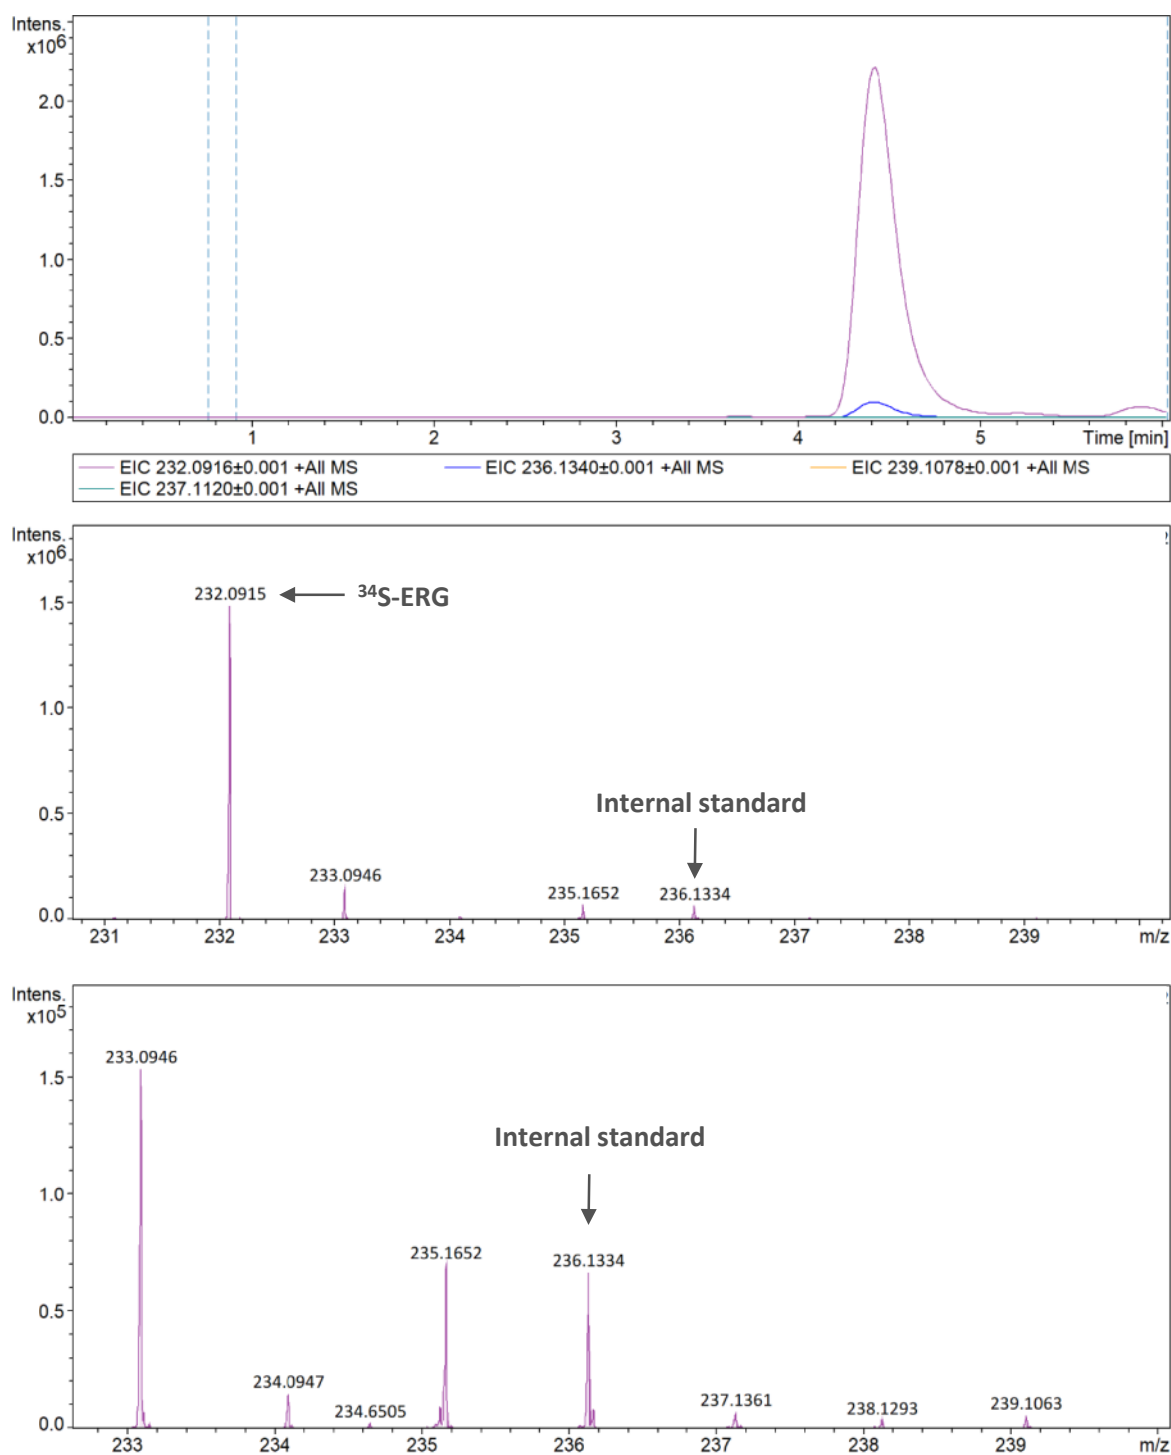

**Figure S9. A:** ESI-HRMS analysis of *CaMES*<sub>K952A</sub> mutant producing *heavy* (*m/z* calc. 237.1120; obs. 237.1123) and *superheavy* ergothioneine (*m/z* calc. 239.1078; obs. 239.1076). Top panel – extracted ion chromatogram, middle and bottom panels – average MS spectrum of the peak (*t<sub>R</sub>* 4.1-4.9 min). **B:** Control ESI-HRMS analysis of *CaMES*<sub>C153S</sub> mutant unable to produce *heavy* and *superheavy* ergothioneine. The signals at 237.13761 and 239.1063 do not correspond to *heavy* and *superheavy* ergothioneine because these masses are outside the 5 ppm tolerance of the calculated masses (Table S3). Top panel – extracted ion chromatogram, middle and bottom panels – average MS spectrum of the peak (*t<sub>R</sub>* 4.1-4.9 min).



## References

1. Vit, A.; Misson, L.; Blankenfeldt, W.; Seebeck, F. P., Ergothioneine biosynthetic methyltransferase EgtD reveals the structural basis of aromatic amino acid betaine biosynthesis. *Chembiochem* **2015**, *16* (1), 119-25.
2. Schindelin, H.; Kisker, C.; Hilton, J.; Rajagopalan, K. V.; Rees, D. C., Crystal Structure of DMSO Reductase: Redox-Linked Changes in Molybdopterin Coordination. *Science* **1996**, *272*, 1615-1621.
